# Supplementary material for: Consumer perceptions and reported wild and domestic meat and fish consumption behavior during the Ebola epidemic in Guinea, West Africa
Source: PeerJ. 2020 Jun 10;8:e9229. doi: 10.7717/peerj.9229 (PMC7293194; doi:10.7717/peerj.9229)
Supplement: File S2 [file peerj-08-9229-s002.xlsx]

## Sheet: Sheet1
ACTOR INFORMATIONS									People reportedly consuming seven potential carrier species before and during the Ebola outbreak.														Fish protein and livestock meat consumpton during Ebola period								Potential animal sources/carriers of Ebola reported by Local population									Sources of Information during Ebola period
Localities		Category	Number	Age	Gender	Religion	Marital status	Ethnic group	Eat Bat during Ebola	Eat Monkey during Ebola	Eat Crested porcupine during Ebola	Eat Cephalophus during Ebola	Eat Greater cane rat during Ebola	Eat Chimpanzees during Ebola	Eat Warthog during Ebola	Eat Bat before Ebola	Eat Monkey before Ebola	Eat Crested porcupine before Ebola	Eat Cephalophus before Ebola	Eat Greater cane rat before Ebola	Eat Chimpanzees before Ebola	Eat Warthog before Ebola	More fish consumption	Reason	Fish less consumed	Reason	Consumed more livestock meat	Reason	Consumed less livestock meat	Reason	Bat	Monkey	Creasted porcupine	Cephalophus	Greater cane rat	Chimpanzees	Warthog	All potential sources	None	Radio	Newspaper	Awareness mission	.
Lola centre	Urban	FS	1	56	1	1	M	Kônon	0	0	0	0	0	0	0	1	1	1	1	1	1	1	1	1	0	0	1	3	0	0	1	1	1	1	1	1	1	0	0	1	1	1
Lola centre	Urban	FS	2	46	1	2	M	Guerzé	0	0	0	0	0	0	0	1	1	1	0	1	1	1	1	1	0	0	1	2	0	0	1	1	1	1	1	1	1	0	0	1	1	1
Lola centre	Urban	CA	3	55	1	3	M	koniaké	0	0	0	0	0	0	0	0	1	1	1	1	1	1	1	2	0	0	1	3	0	0	1	1	1	1	1	1	1	0	0	1	1	1
Lola centre	Urban	CA	4	45	1	3	M	koniaké	0	0	0	0	0	0	0	0	1	1	0	1	1	1	1	1	0	0	1	3	0	0	1	1	1	1	0	1	1	0	0	1	1	1
Lola centre	Urban	EM	5	70	1	1	M	Guerzé	0	0	0	0	0	0	0	0	1	1	1	1	1	1	1	1	0	0	1	1	0	0	1	1	1	1	0	1	0	0	0	1	1	1
Lola centre	Urban	EM	6	60	1	2	M	Kônon	0	0	0	0	0	0	0	0	1	1	1	1	1	1	1	1	0	0	1	2	0	0	1	1	0	1	1	0	1	0	0	1	1	1
Lola centre	Urban	EM	7	55	1	1	M	Guerzé	0	0	0	0	0	0	0	0	1	1	1	1	1	1	1	1	0	0	1	1	0	0	1	1	1	1	0	0	1	0	0	0	1	1
Lola centre	Urban	EM	8	76	1	3	M	Kônon	0	0	0	0	0	0	0	0	1	1	1	1	1	1	1	1	0	0	0	0	1	1	1	1	1	1	0	0	0	0	0	1	1	1
Lola centre	Urban	FA	9	37	1	1	M	Guerzé	0	0	1	1	1	1	1	1	1	1	1	1	1	1	0	0	1	1	0	0	1	1	1	1	0	1	0	0	0	0	0	1	1	1
Lola centre	Urban	FA	10	40	1	1	M	Kônon	0	1	1	1	1	1	1	1	1	1	1	1	1	1	1	1	0	0	0	0	1	1	1	0	0	0	0	0	0	0	0	1	1	1
Lola centre	Urban	FA	11	35	1	1	M	Guerzé	0	0	0	0	1	0	1	1	1	1	1	1	1	1	1	1	0	0	0	0	1	1	1	1	0	1	1	0	0	0	0	1	1	1
Lola centre	Urban	FA	12	60	1	2	M	Guerzé	0	0	1	1	1	1	1	1	1	1	1	1	1	1	0	0	1	1	0	0	1	1	1	0	1	0	0	0	0	0	0	1	1	1
Lola centre	Urban	FA	13	52	1	3	M	koniaké	0	0	0	0	0	0	0	0	1	1	1	1	1	0	1	1	0	0	0	0	1	1	1	1	1	1	0	1	1	0	0	1	1	1
Lola centre	Urban	FA	14	45	1	1	M	Manon	0	1	1	1	1	0	1	1	1	1	1	1	0	1	1	4	0	0	0	0	1	1	1	0	0	0	0	0	0	0	0	1	1	1
Lola centre	Urban	FA	15	40	1	1	M	kônon	0	1	1	1	1	0	1	1	1	1	1	1	0	1	1	1	0	0	0	0	1	1	1	0	0	0	0	0	0	0	0	1	1	1
Lola centre	Urban	FA	16	47	1	3	M	koniaké	0	0	1	1	1	0	0	0	0	1	1	1	0	0	1	1	0	0	1	2	0	0	1	1	1	0	0	1	1	0	0	1	1	1
Lola centre	Urban	FA	17	52	1	2	C	Guerzé	0	1	1	1	1	0	1	1	1	1	1	1	1	1	0	0	1	1	0	0	1	1	1	0	0	0	0	0	0	0	0	0	1	1
Lola centre	Urban	FA	18	38	1	1	M	Guerzé	0	0	0	0	0	0	0	1	0	1	1	1	1	1	1	1	0	0	1	2	0	0	1	1	0	1	0	1	1	0	0	0	1	1
Lola centre	Urban	FA	19	43	1	2	S	Manon	0	0	1	1	1	1	1	0	0	0	0	0	0	1	1	1	0	0	0	0	1	1	1	0	0	0	0	0	0	0	0	1	1	1
Lola centre	Urban	FA	20	57	1	2	M	Kônon	0	0	0	0	0	0	0	0	0	0	0	0	0	0	1	1	0	0	0	0	1	1	1	1	0	1	0	1	1	0	0	1	1	1
Lola centre	Urban	FA	21	60	1	1	M	Kônon	0	0	1	1	1	1	1	1	1	1	1	1	1	1	1	1	0	0	0	0	1	1	0	0	0	0	0	0	0	1	0	1	1	0
Lola centre	Urban	FA	22	65	1	2	M	Kônon	0	0	0	0	0	0	0	1	1	1	1	1	1	1	1	1	0	0	0	0	1	1	1	1	1	1	1	0	0	0	0	1	1	1
Lola centre	Urban	FA	23	48	1	3	M	Kônon	0	1	1	1	1	1	1	0	0	1	1	1	0	0	1	1	0	0	0	0	1	1	1	0	0	0	0	0	0	0	0	0	1	1
Lola centre	Urban	FA	24	54	1	3	M	koniaké	0	0	0	0	0	0	0	0	1	1	1	1	0	1	1	1	0	0	0	0	1	1	1	1	1	1	0	1	1	0	0	0	1	1
Lola centre	Urban	FA	25	50	1	2	S	Guerzé	0	0	1	1	1	0	0	1	1	1	1	1	0	0	1	1	0	0	0	0	1	1	1	1	1	0	0	1	1	0	0	1	1	1
Lola centre	Urban	FA	26	75	1	2	M	Kônon	0	0	0	0	0	0	0	1	1	1	1	1	1	1	0	0	1	1	0	0	1	1	1	1	1	1	0	1	0	0	0	1	1	0
Lola centre	Urban	FA	27	70	1	1	M	Guerzé	0	0	1	1	1	1	1	0	1	1	1	1	1	1	1	1	0	0	0	0	1	1	1	1	0	0	0	0	0	0	0	1	1	1
Lola centre	Urban	FA	28	50	1	1	M	Kônon	0	1	1	1	1	0	1	0	1	1	1	1	1	1	1	1	0	0	0	0	1	1	1	0	0	0	0	0	0	0	0	1	1	1
Lola centre	Urban	FA	29	49	1	2	M	Kônon	0	1	0	1	1	1	1	1	1	1	1	1	1	1	1	1	0	0	0	0	1	1	1	0	1	0	0	0	0	0	0	0	1	1
Lola centre	Urban	FA	30	44	1	2	M	Kônon	0	0	0	0	0	0	0	1	1	1	1	1	1	1	1	1	0	0	0	0	1	1	1	1	0	1	0	1	1	0	0	1	1	1
Lola centre	Urban	FA	31	52	1	1	M	Guerzé	0	1	1	1	1	1	1	1	1	1	1	1	0	1	1	1	0	0	0	0	1	1	1	0	0	0	0	0	0	0	0	1	1	1
Lola centre	Urban	FA	32	40	1	2	M	Manon	0	0	1	1	1	0	1	1	1	1	1	1	0	1	1	1	0	0	0	0	1	1	1	1	1	0	0	1	0	0	0	0	1	1
Lola centre	Urban	FA	33	45	1	1	S	Kônon	0	0	1	1	1	0	1	1	1	1	1	1	1	1	1	2	0	0	0	0	1	1	1	1	0	0	0	0	0	0	0	1	1	1
Lola centre	Urban	FA	34	67	1	1	C	Kônon	0	0	0	0	0	0	0	1	1	1	1	1	0	1	1	4	0	0	0	0	1	1	1	0	0	1	0	1	0	0	0	1	1	1
Lola centre	Urban	FA	35	52	1	3	M	koniaké	0	0	0	0	0	0	0	0	0	1	1	1	0	0	1	1	0	0	0	0	1	1	1	1	0	1	0	0	1	0	0	1	1	1
Lola centre	Urban	FA	36	63	1	2	M	Guerzé	0	0	1	1	1	0	1	1	1	1	1	1	0	1	1	1	0	0	0	0	1	1	1	1	0	0	0	1	0	0	0	1	1	1
Lola centre	Urban	FA	37	72	1	3	M	koniaké	0	1	1	1	1	0	1	1	1	1	1	1	0	0	1	1	0	0	0	0	1	1	1	0	0	0	0	0	0	0	0	0	1	1
Lola centre	Urban	FA	38	77	1	1	M	Kônon	0	0	1	1	1	0	1	1	1	1	1	1	0	1	1	1	0	0	0	0	1	1	1	1	0	0	0	0	0	0	0	1	1	1
Lola centre	Urban	FA	39	35	1	1	M	Kônon	0	0	1	1	1	0	1	1	1	1	1	1	0	1	1	1	0	0	0	0	1	1	1	1	0	0	0	1	0	0	0	1	1	1
Lola centre	Urban	FA	40	43	1	2	M	Guerzé	0	0	1	1	1	0	1	1	1	1	1	1	0	1	1	1	0	0	0	0	1	1	1	0	0	0	0	1	0	0	0	1	1	1
Lola centre	Urban	FA	41	38	1	1	M	Manon	0	0	1	1	1	0	1	0	0	1	1	1	0	1	1	1	0	0	0	0	1	1	1	1	1	0	0	1	0	0	0	1	1	1
Lola centre	Urban	FA	42	57	1	3	M	koniaké	0	0	1	1	1	0	0	0	0	1	1	1	0	0	1	1	0	0	0	0	1	1	1	1	0	0	0	1	0	0	0	1	1	1
Lola centre	Urban	FA	43	56	1	1	M	Kônon	0	1	1	1	1	1	1	1	1	1	1	1	0	1	1	1	0	0	0	0	1	1	1	0	0	0	0	0	0	0	0	1	1	1
Lola centre	Urban	FA	44	38	1	1	M	Manon	0	0	1	1	1	0	1	1	1	1	1	1	0	1	1	1	0	0	0	0	1	1	1	1	0	0	0	1	0	0	0	0	1	1
Lola centre	Urban	FA	45	47	1	2	M	Manon	0	0	0	0	0	0	0	1	1	1	1	1	1	1	1	1	0	0	0	0	1	1	1	0	0	0	0	1	0	0	0	1	1	1
Lola centre	Urban	FA	46	69	1	1	M	Guerzé	0	0	1	1	1	0	1	1	1	1	1	1	0	1	1	1	0	0	0	0	1	1	1	1	0	0	0	0	0	0	0	1	1	1
Lola centre	Urban	FA	47	39	1	1	M	Kônon	0	0	1	1	1	1	0	1	1	1	1	1	1	1	1	2	0	0	0	0	1	1	1	1	0	0	0	0	0	0	0	1	1	1
Lola centre	Urban	FA	48	41	1	3	M	Koniaké	0	0	1	1	1	0	0	1	1	1	1	1	1	1	1	1	0	0	0	0	1	1	1	1	0	0	0	1	0	0	0	1	1	1
Lola centre	Urban	HU	49	54	1	1	M	Guerzé	0	0	1	1	1	0	1	0	0	1	1	1	1	1	1	1	0	0	0	0	1	1	1	1	1	0	0	0	0	0	0	1	0	1
Lola centre	Urban	HU	50	50	1	2	M	Kônon	0	1	1	1	1	0	1	0	1	1	1	1	1	1	1	1	0	0	0	0	1	1	0	0	0	0	0	0	0	1	0	1	1	1
Lola centre	Urban	HU	51	67	1	3	M	koniaké	0	1	1	1	1	1	1	0	1	1	1	1	1	1	1	1	0	0	0	0	1	1	1	0	0	0	0	0	0	0	0	1	1	1
Lola centre	Urban	HU	52	70	1	1	M	Guerzé	0	0	1	1	1	0	1	1	0	1	1	1	1	0	1	1	0	0	0	0	1	1	1	1	0	0	0	0	0	0	0	1	1	1
Lola centre	Urban	HU	53	75	1	3	M	Koniaké	0	0	1	1	1	1	1	1	1	1	1	1	1	1	1	1	0	0	0	0	1	1	1	0	0	0	0	0	0	0	0	1	1	1
Lola centre	Urban	HU	54	51	1	1	M	Kônon	0	1	1	1	1	0	1	1	1	1	1	1	1	1	1	1	0	0	0	0	1	1	1	0	0	0	0	0	0	0	0	0	1	1
Lola centre	Urban	HU	55	56	1	2	M	Kônon	0	0	0	0	0	0	0	1	1	1	1	1	0	1	1	1	0	0	0	0	1	1	1	1	0	0	0	0	0	0	0	1	0	1
Lola centre	Urban	HU	56	42	1	1	M	Guerzé	0	1	1	1	1	0	1	1	1	1	1	1	0	1	1	1	0	0	0	0	1	1	1	0	0	0	0	0	0	0	0	1	1	1
Lola centre	Urban	HU	57	58	1	2	M	Kônon	0	1	1	1	1	0	1	1	1	1	1	1	1	1	1	1	0	0	0	0	1	1	0	0	0	0	0	0	0	1	0	1	1	1
Lola centre	Urban	HU	58	52	1	1	M	Guerzé	0	0	0	0	0	0	0	1	1	1	1	1	0	1	1	1	0	0	0	0	1	1	1	1	1	0	0	1	1	0	0	1	1	1
Lola centre	Urban	HU	59	61	1	1	M	Manon	0	1	1	1	1	0	1	1	1	1	1	1	0	0	1	1	0	0	0	0	1	1	1	0	0	0	0	0	0	0	0	1	1	1
Lola centre	Urban	HU	60	50	1	2	M	Manon	1	1	1	1	1	0	1	1	1	0	1	1	0	1	1	1	0	0	0	0	1	1	0	0	0	0	0	0	0	0	1	1	1	1
Lola centre	Urban	HU	61	45	1	2	M	Guerzé	0	1	1	1	1	0	1	1	1	1	1	1	1	1	1	1	0	0	0	0	1	1	1	0	0	0	0	0	0	0	0	1	1	1
Lola centre	Urban	HU	62	35	1	3	M	Koniaké	0	0	1	1	1	0	0	0	0	1	1	1	0	0	1	1	0	0	0	0	1	1	1	1	0	0	0	1	1	0	0	1	1	1
Lola centre	Urban	HU	63	45	1	3	M	Koniaké	0	0	1	1	1	0	0	0	0	1	1	1	0	0	1	1	0	0	0	0	1	1	1	0	1	0	0	1	1	0	0	1	1	1
Lola centre	Urban	LR	64	43	2	1	M	Kônon	0	0	1	1	1	0	1	0	1	1	1	1	0	1	0	0	1	1	0	0	1	3	1	1	0	0	0	0	0	0	0	1	1	1
Lola centre	Urban	LR	65	40	2	2	M	Guerzé	0	1	1	1	1	0	1	1	1	1	1	1	0	1	0	0	1	1	0	0	1	3	1	0	0	0	0	0	0	0	0	1	1	1
Lola centre	Urban	LR	66	33	2	2	C	Kônon	0	0	1	1	1	0	1	0	1	1	1	1	0	1	0	0	1	1	0	0	1	3	1	1	0	0	0	0	0	0	0	1	1	1
Lola centre	Urban	LR	67	38	2	1	M	Kissi	0	1	1	1	1	0	1	0	1	1	1	1	0	1	0	0	1	1	0	0	1	3	1	1	0	0	0	1	0	0	0	1	1	1
Lola centre	Urban	LR	68	40	2	2	M	Kônon	0	0	1	1	1	0	1	0	1	1	1	0	0	1	0	0	1	1	0	0	1	3	1	0	0	0	0	1	0	0	0	1	1	1
Lola centre	Urban	LR	69	41	2	2	M	Guerzé	0	0	1	1	1	0	1	0	1	1	1	1	0	1	0	0	1	1	0	0	1	2	1	1	0	0	0	1	0	0	0	1	1	1
Lola centre	Urban	LR	70	52	2	1	M	Kônon	0	1	1	1	1	0	1	1	1	1	1	1	0	1	0	0	1	1	0	0	1	3	1	0	0	0	0	1	0	0	0	0	1	1
Lola centre	Urban	LR	71	50	2	1	M	Manon	0	0	1	1	1	0	1	1	1	1	1	1	0	1	0	0	1	2	0	0	1	2	1	1	0	0	0	1	0	0	0	1	1	1
Lola centre	Urban	LR	72	48	2	1	M	Zogwota	0	0	0	0	0	0	0	0	1	1	1	1	1	1	1	4	0	0	1	4	0	0	1	1	0	1	0	1	1	0	0	1	1	1
Lola centre	Urban	LR	73	39	2	2	M	Toma	0	0	0	0	0	0	0	1	0	1	1	1	1	0	1	4	0	0	1	4	0	0	1	1	1	1	0	1	0	0	0	1	1	1
Lola centre	Urban	LR	74	42	2	1	M	Kônon	0	1	1	1	1	0	1	0	1	1	1	0	1	1	1	2	0	0	1	4	0	0	1	0	1	1	0	1	1	0	0	1	1	1
Lola centre	Urban	LR	75	51	2	1	M	koniaké	0	0	1	1	1	0	1	1	1	0	0	1	0	1	1	1	0	0	1	4	0	0	1	1	0	1	0	1	0	0	0	1	1	1
Lola centre	Urban	LR	76	28	2	3	C	Malinké	0	0	0	0	0	0	0	0	0	1	1	1	1	1	1	1	0	0	1	2	0	0	1	1	0	1	0	1	1	0	0	1	1	1
Lola centre	Urban	LR	77	30	2	3	M	koniaké	0	0	0	0	0	0	0	1	1	1	1	1	0	0	1	1	0	0	1	4	0	0	1	0	1	1	0	1	1	0	0	1	1	1
Lola centre	Urban	LR	78	31	2	3	M	koniaké	0	0	0	0	0	0	0	0	1	1	0	1	0	1	1	1	0	0	1	4	0	0	1	1	1	1	0	1	0	0	0	1	1	1
Lola centre	Urban	LR	79	40	2	2	M	Kônon	0	0	1	1	1	0	1	1	1	1	1	1	1	1	0	0	1	1	0	0	1	3	1	1	0	0	0	0	0	0	0	1	1	1
Lola centre	Urban	LR	80	42	2	2	M	Toma	0	1	1	1	1	0	1	1	1	1	1	1	0	1	0	0	1	1	0	0	1	3	1	0	0	0	0	0	0	0	0	0	1	1
Lola centre	Urban	LR	81	38	2	1	M	Guerzé	0	0	1	1	1	0	1	0	1	1	1	1	0	1	0	0	1	1	0	0	1	3	1	1	0	0	0	0	0	0	0	1	1	1
Lola centre	Urban	LR	82	35	2	2	M	Toma	0	1	1	1	1	0	1	0	1	1	1	1	0	1	0	0	1	1	0	0	1	3	1	1	0	0	0	1	0	0	0	1	1	1
Lola centre	Urban	LR	83	35	2	3	C	koniaké	0	0	0	0	0	0	0	0	0	0	0	0	0	0	1	1	0	0	1	4	0	0	1	1	0	1	0	1	1	0	0	0	1	1
Lola centre	Urban	HO	84	50	2	2	M	Manon	0	0	1	1	1	0	1	1	1	1	1	1	1	1	1	1	0	0	0	0	1	1	1	0	0	0	0	0	0	0	0	1	1	0
Lola centre	Urban	HO	85	30	2	1	M	Kônon	0	1	1	1	1	0	1	1	1	1	1	1	1	1	1	1	0	0	0	0	1	1	1	1	0	0	0	0	0	0	0	0	1	1
Lola centre	Urban	HO	86	48	2	2	M	Manon	0	0	0	0	0	0	0	1	1	1	1	1	1	1	1	4	0	0	1	1	0	0	1	1	1	1	1	1	0	0	0	1	1	1
Lola centre	Urban	HO	87	50	2	2	M	kônon	0	0	0	0	0	0	0	0	1	1	1	1	1	1	1	1	0	0	1	2	0	0	1	1	0	1	1	1	0	0	0	1	1	1
Lola centre	Urban	HO	88	52	2	1	M	Kônon	0	0	0	0	0	0	0	0	1	1	1	1	1	1	1	1	0	0	1	3	0	0	1	1	0	1	0	1	0	0	0	1	0	1
Lola centre	Urban	HO	89	43	2	3	M	Malinké	0	0	0	0	0	0	0	1	1	1	1	1	1	1	1	1	0	0	1	2	0	0	1	1	0	1	0	1	0	0	0	1	1	1
Lola centre	Urban	HO	90	75	2	1	M	Kônon	0	0	0	0	0	0	0	0	1	1	1	1	1	1	1	1	0	0	1	2	0	0	1	1	1	1	0	0	0	0	0	1	1	1
Lola centre	Urban	HO	91	78	2	2	M	Manon	0	0	0	0	0	0	0	0	1	1	1	1	1	1	1	1	0	0	1	2	0	0	1	1	0	1	0	0	1	0	0	1	1	1
Lola centre	Urban	HO	92	35	2	1	M	Kônon	0	0	1	1	1	0	1	1	1	1	1	1	1	1	1	1	0	0	0	0	1	1	0	0	0	0	0	0	0	1	0	1	1	1
Lola centre	Urban	HO	93	37	2	2	M	Manon	0	1	1	1	1	0	1	1	1	1	1	1	1	1	1	1	0	0	0	0	1	1	1	0	0	0	0	1	0	0	0	1	0	1
Lola centre	Urban	HO	94	47	2	2	M	Guerzé	0	0	1	1	1	0	0	1	0	1	1	1	1	0	1	1	0	0	0	0	1	1	1	1	0	0	0	1	1	0	0	1	0	1
Lola centre	Urban	HO	95	58	2	1	M	Manon	1	1	1	1	1	1	1	1	1	1	1	1	1	1	1	1	0	0	0	0	1	1	0	0	0	0	0	0	0	0	1	1	1	1
Lola centre	Urban	HO	96	60	2	1	M	Guerzé	1	1	1	1	1	1	1	1	1	1	1	1	0	1	1	1	0	0	0	0	1	1	0	0	0	0	0	0	0	0	1	1	1	1
Lola centre	Urban	HO	97	32	2	3	M	Malinké	0	0	1	1	1	0	0	0	0	1	1	1	0	0	1	1	0	0	0	0	1	1	1	1	0	0	0	1	0	0	0	1	0	1
Lola centre	Urban	HO	98	29	2	3	M	Kônon	0	0	1	1	0	0	0	0	0	1	1	1	0	0	1	1	0	0	0	0	1	1	1	1	0	0	0	1	1	0	0	1	1	0
Lola centre	Urban	HO	99	30	2	3	M	koniaké	0	0	0	0	0	0	0	0	0	1	1	1	0	0	1	1	0	0	1	2	0	0	0	0	0	0	0	0	0	0	1	0	1	1
Lola centre	Urban	HO	100	35	2	3	M	Malinké	0	0	1	1	0	0	0	0	0	1	1	1	0	0	1	1	0	0	0	0	1	2	1	1	0	0	0	1	1	0	0	0	1	1
Lola centre	Urban	HO	101	45	2	3	M	Kônon	0	0	0	0	0	0	0	0	0	1	1	1	0	0	1	1	0	0	1	3	0	0	1	1	0	1	0	1	0	0	0	1	1	1
Lola centre	Urban	HO	102	48	2	3	M	konon	0	0	0	0	0	0	0	0	0	1	0	1	0	0	1	1	0	0	1	3	0	0	1	1	1	1	0	1	1	0	0	0	1	1
Lola centre	Urban	HO	103	31	2	3	M	Toma	0	0	0	0	0	0	0	0	0	1	1	1	0	0	1	5	0	0	1	3	0	0	1	0	1	1	0	1	0	0	0	1	1	1
Lola centre	Urban	HO	104	43	2	2	M	Guerzé	0	0	1	1	1	0	1	1	1	1	1	1	0	1	1	2	0	0	0	0	1	1	0	1	0	0	0	0	0	0	0	1	1	0
Lola centre	Urban	HO	105	56	2	3	M	Koniaké	0	0	1	1	1	0	0	0	0	1	1	1	0	0	1	1	0	0	0	0	1	1	1	1	0	0	0	1	1	0	0	1	1	1
Lola centre	Urban	HO	106	65	2	2	M	Guerzé	0	1	1	1	1	1	1	1	1	1	1	1	1	1	1	1	0	0	0	0	1	2	0	0	0	0	0	0	0	1	0	1	1	1
Lola centre	Urban	HO	107	25	2	3	M	Kônon	0	0	0	0	0	0	0	0	0	1	1	1	0	0	1	1	0	0	0	0	1	1	1	1	0	1	0	1	0	0	0	1	1	1
Lola centre	Urban	HO	108	41	2	3	M	koniaké	0	0	0	0	0	0	0	0	0	1	1	1	0	0	1	1	0	0	0	0	1	1	1	0	0	0	0	1	1	0	0	1	1	1
Lola centre	Urban	HO	109	43	2	1	M	Guerzé	0	0	0	0	0	0	0	0	0	1	1	1	0	0	1	1	0	0	0	0	1	1	1	1	1	1	0	1	1	0	0	1	1	1
Lola centre	Urban	HO	110	53	2	3	M	Malinké	0	0	0	1	1	0	1	1	0	0	0	0	0	0	1	1	0	0	0	0	1	1	1	1	1	0	0	0	0	0	0	1	1	1
Guéasso centre	Urban	FS	111	65	1	2	M	Zogwota	0	0	0	0	0	0	0	0	1	0	1	1	1	0	1	2	0	0	1	2	0	0	1	1	1	1		1	0	0	0	1	0	0
Guéasso centre	Urban	FS	112	62	1	1	M	Guerzé	0	0	0	0	0	0	0	0	0	1	0	0	0	1	1	1	0	0	1	2	0	0	1	1	1	1	1	1	0	0	0	0	1	1
Guéasso centre	Urban	FS	113	40	1	2	M	konon	0	0	0	0	0	0	0	0	0	0	1	1	0	0	1	1	0	0	1	3	0	0	1	1	0	0	0	1	0	0	0	1	1	1
Guéasso centre	Urban	CA	114	58	1	3	M	Zogwota	0	0	0	0	0	0	0	0	0	1	0	0	0	0	1	2	0	0	1	2	0	0	1	1	0	1	0	1	0	0	0	1	1	1
Guéasso centre	Urban	CA	115	42	1	1	M	koniaké	0	0	0	0	0	0	0	1	1	0	0	0	0	0	1	2	0	0	1	3	0	0	0	1	1	1	0	1	0	0	0	1	1	1
Guéasso centre	Urban	FA	116	36	1	1	M	Zogwota	0	1	1	1	1	1	1	1	1	1	1	1	1	1	0	0	1	1	0	0	1	1	1	1	0	0	0	1	0	0	0	1	1	1
Guéasso centre	Urban	FA	117	39	1	1	M	Kônon	0	0	1	1	1	0	1	1	1	1	1	1	1	1	0	0	1	1	0	0	1	1	1	1	1	0	0	1	0	0	0	1	1	1
Guéasso centre	Urban	FA	118	42	1	1	M	Maouka	0	1	1	1	1	0	1	1	1	1	1	1	1	1	1	1	0	0	0	0	1	1	1	0	0	1	0	1	0	0	0	0	1	1
Guéasso centre	Urban	FA	119	51	1	1	M	Guerzé	1	1	1	1	1	1	1	1	1	1	1	1	1	1	1	1	0	0	0	0	1	1	1	1	0	0	1	1	0	0	0	1	1	1
Guéasso centre	Urban	FA	120	28	1	1	M	Kônon	0	1	1	1	1	0	1	1	1	0	1	1	0	0	1	1	0	0	0	0	1	1	0	0	0	0	0	0	0	1	0	0	1	1
Guéasso centre	Urban	FA	121	29	1	1	M	Maouka	0	0	1	1	1	0	1	1	1	1	1	1	0	1	1	1	0	0	0	0	1	1	1	0	0	0	0	0	0	0	0	1	1	1
Guéasso centre	Urban	FA	122	33	1	1	M	Kônon	0	0	1	1	1	0	1	1	1	1	1	1	0	1	1	1	0	0	0	0	1	1	1	0	0	0	0	1	0	0	0	0	1	1
Guéasso centre	Urban	FA	123	37	1	1	M	Kônon	0	1	1	1	1	0	1	1	1	0	1	1	0	0	1	1	0	0	0	0	1	1	1	0	0	0	0	1	0	0	0	1	1	1
Guéasso centre	Urban	FA	124	41	1	1	M	Guerzé	0	1	1	1	1	1	0	1	1	1	1	1	1	1	1	1	0	0	0	0	1	1	0	0	0	0	0	0	0	1	0	1	1	1
Guéasso centre	Urban	FA	125	39	1	2	M	Guerzé	0	1	1	1	1	1	0	1	1	1	1	1	1	1	0		1	1	0	0	1	2	1	0	0	0	0	1	0	0	0	1	1	1
Guéasso centre	Urban	FA	126	42	1	1	M	Kônon	0	1	1	1	1	1	0	1	1	1	1	1	1	1	1	1	0	0	0	0	1	1	1	0	0	0	0	1	0	0	0	1	1	1
Guéasso centre	Urban	FA	127	30	1	1	M	Kônon	1	1	1	1	1	1	1	1	1	1	1	1	0	1	1	3	0	0	0	0	1	2	0	1	0	1	0	1	0	0	0	1	1	1
Guéasso centre	Urban	FA	128	35	1	1	M	Guerzé	0	1	1	1	1	1	1	1	1	1	1	1	0	1	1	1	0	0	0	0	1	1	1	0	1	1	0	0	0	0	0	1	1	1
Guéasso centre	Urban	FA	129	37	1	2	M	Maouka	0	0	1	1	1	0	1	1	1	1	1	1	0	1	0	0	1	1	0	0	1	1	1	0	0	0	0	0	0	0	0	1	1	1
Guéasso centre	Urban	FA	130	41	1	1	M	Kônon	1	1	1	1	1	1	1	1	1	1	1	1	0	1	1	1	0	0	0	0	1	2	1	1	1	1	1	1	0	0	0	1	1	1
Guéasso centre	Urban	FA	131	52	1	3	M	Kônon	0	0	0	0	0	0	0	1	0	1	1	1	1	0	1	1	0	0	0	0	1	1	1	1	0	0	0	0	0	0	0	1	1	1
Guéasso centre	Urban	FA	132	58	1	3	M	Maouka	0	0	0	0	0	0	0	0	0	1	1	1	1	0	1	1	0	0	0	0	1	1	1	1	1	0	1	1	0	0	0	1	1	1
Guéasso centre	Urban	FA	133	33	1	2	M	Kônon	0	1	1	1	1	0	1	0	1	1	1	1	1	1	0	0	1	2	0	0	1	2	1	0	0	0	0	1	0	0	0	0	1	1
Guéasso centre	Urban	FA	134	30	1	1	M	Kônon	0	0	1	1	1	1	1	1	1	1	1	1	1	1	1	1	0	0	0	0	1	1	1	0	0	0	0	1	0	0	0	1	1	1
Guéasso centre	Urban	FA	135	39	1	2	M	Guerzé	0	1	1	1	1	0	1	0	1	1	1	1	1	1	0	0	1	1	0	0	1	1	1	0	0	0	0	1	0	0	0	1	1	1
Guéasso centre	Urban	FA	136	42	1	2	M	Kônon	0	1	1	1	1	0	1	0	1	1	1	1	1	1	1	3	0	0	0	0	1	2	1	0	0	0	0	0	0	0	0	1	1	1
Guéasso centre	Urban	FA	137	51	1	2	M	Guerzé	0	1	1	1	1	0	1	0	1	1	1	1	1	1	0	0	1	1	0	0	1	2	1	0	0	0	0	1	0	0	0	1	1	1
Guéasso centre	Urban	FA	138	28	1	1	M	Manon	0	1	1	1	1	0	1	0	1	1	1	1	1	1	1	5	0	0	0	0	1	1	1	0	0	0	0	1	0	0	0	1	1	1
Guéasso centre	Urban	FA	139	37	1	1	M	Kônon	1	1	1	1	1	0	1	1	1	1	1	1	0	1	1	1	0	0	0	0	1	2	0	0	0	0	0	1	0	0	0	1	1	1
Guéasso centre	Urban	FA	140	41	1	1	M	Guerzé	0	0	1	1	1	0	1	1	1	1	1	1	0	1	0	0	1	1	0	0	1	2	1	1	0	0	0	1	0	0	0	1	1	1
Guéasso centre	Urban	FA	141	39	1	2	M	Guerzé	1	1	1	1	1	1	1	1	1	1	1	1	1	1	1	1	0	0	0	0	1	1	0	0	0	0	0	0	0	0	1	1	1	1
Guéasso centre	Urban	FA	142	41	1	1	M	Kônon	0	0	0	0	0	0	0	1	1	1	1	1	1	1	1	1	0	0	0	0	1	2	1	1	1	1	0	1	0	0	0	1	1	1
Guéasso centre	Urban	FA	143	51	1	1	M	Guerzé	1	1	1	1	1	1	1	1	1	1	1	1	1	1	1	1	0	0	0	0	1	2	1	0	1	1	1	0	0	0	0	1	1	1
Guéasso centre	Urban	FA	144	28	1	1	M	Kônon	0	1	1	1	1	0	1	1	1	0	1	1	0	0	1	1	0	0	0	0	1	1	1	0	0	0	0	0	0	0	0	1	1	1
Guéasso centre	Urban	FA	145	29	1	1	M	Kônon	0	0	1	1	1	0	1	1	1	1	1	1	0	1	1	1	0	0	0	0	1	1	1	0	0	0	0	1	0	0	0	1	1	1
Guéasso centre	Urban	FA	146	39	1	1	M	Kônon	0	0	1	1	1	0	1	1	1	1	1	1	1	1	0	0	1	1	0	0	1	1	1	1	1	1	0	1	0	0	0	1	1	1
Guéasso centre	Urban	FA	147	42	1	1	M	Kônon	0	1	1	1	1	0	1	1	1	1	1	1	1	1	1	1	0	0	0	0	1	1	1	1	1	1	0	0	0	0	0	1	1	1
Guéasso centre	Urban	FA	148	51	1	1	M	Guerzé	1	1	1	1	1	1	1	1	1	1	1	1	1	1	1	1	0	0	0	0	1	1	1	0	1	1	0	1	0	0	0	1	1	1
Guéasso centre	Urban	FA	149	30	1	1	M	Kônon	0	0	1	1	1	1	1	1	1	1	1	1	1	1	1	3	0	0	0	0	1	1	1	0	0	0	0	1	0	0	0	1	1	1
Guéasso centre	Urban	FA	150	39	1	2	M	Guerzé	0	1	1	1	1	0	1	0	1	1	1	1	1	1	0	0	1	1	0	0	1	1	1	0	0	0	0	1	0	0	0	0	1	1
Guéasso centre	Urban	FA	151	42	1	2	M	Kônon	0	1	1	1	1	0	1	0	1	1	1	1	1	1	1	1	0	0	0	0	1	2	1	0	0	0	0	1	0	0	0	1	1	1
Guéasso centre	Urban	FA	152	60	1	3	M	koniaké	0	0	0	0	0	0	0	0	0	0	1	1	1	0	1	1	0	0	0	0	1	2	1	1	1	0	0	1	0	0	0	0	1	1
Guéasso centre	Urban	FA	153	61	1	3	M	koniaké	0	0	0	0	0	0	0	0	0	0	1	1	1	0	1	1	0	0	0	0	1	2	1	1	1	0	0	0	0	0	0	1	1	1
Guéasso centre	Urban	FA	154	62	1	3	M	koniaké	0	0	0	0	0	0	0	0	0	0	1	1	1	0	1	1	0	0	0	0	1	2	1	1	1	0	0	1	0	0	0	0	1	1
Guéasso centre	Urban	FA	155	63	1	3	M	Manon	0	0	0	0	0	0	0	0	0	0	1	1	1	0	1	5	0	0	0	0	1	2	1	1	1	0	0	1	0	0	0	1	1	1
Guéasso centre	Urban	HU	156	47	1	3	M	Koniaké	0	0	1	1	1	0	0	0	0	1	1	1	0	0	1	1	0	0	0	0	1	2	0	0	0	0	0	0	0	0	1	1	1	1
Guéasso centre	Urban	HU	157	39	1	3	M	Kônon	0	0	1	1	1	0	0	1	1	1	1	1	0	0	1	3	0	0	0	0	1	1	0	0	0	0	0	0	0	0	1	1	0	1
Guéasso centre	Urban	HU	158	52	1	1	M	Guerzé	0	0	0	0	0	0	0	1	1	1	1	1	0	1	1	1	0	0	0	0	1	1	0	0	0	0	0	0	0	0	1	1	1	0
Guéasso centre	Urban	HU	159	61	1	1	M	Manon	0	1	1	1	1	0	1	1	1	1	1	1	0	1	1	1	0	0	0	0	1	1	0	0	0	0	0	0	0	0	1	0	1	1
Guéasso centre	Urban	HU	160	50	1	2	M	Manon	1	1	1	1	1	0	1	1	1	1	1	1	0	1	1	1	0	0	0	0	1	1	0	0	0	0	0	0	0	0	1	1	1	0
Guéasso centre	Urban	HU	161	48	1	2	M	Guerzé	0	1	1	1	1	0	1	1	1	1	1	1	0	1	1	1	0	0	0	0	1	1	1	0	0	0	0	1	0	0	0	1	0	1
Guéasso centre	Urban	HU	162	52	1	2	M	Kônon	1	1	1	1	1	1	1	1	1	1	1	1	0	1	1	1	0	0	0	0	1	2	1	0	0	0	0	0	0	0	0	1	1	1
Guéasso centre	Urban	HU	163	49	1	3	M	koniaké	0	0	0	0	0	0	0	0	0	1	1	1	0	0	1	1	0	0	0	0	1	2	1	1	1	0	0	1	0	0	0	1	1	1
Guéasso centre	Urban	HU	164	50	1	2	M	Kônon	0	0	1	1	1	0	0	0	0	1	1	1	0	0	1	1	0	0	0	0	1	2	1	1	1	0	0	1	0	0	0	1	1	0
Guéasso centre	Urban	HU	165	46	1	1	M	Kônon	0	0	1	1	1	0	0	1	1	1	1	1	0	0	1	3	0	0	0	0	1	1	1	0	0	1	0	0	0	0	0	1	0	1
Guéasso centre	Urban	HU	166	40	1	1	M	Guerzé	0	0	0	0	0	0	0	1	1	1	1	1	0	1	1	1	0	0	0	0	1	1	0	1	1	0	0	1	0	0	0	0	1	1
Guéasso centre	Urban	HU	167	63	1	1	M	Kônon	0	1	1	1	1	0	1	1	1	1	1	1	0	1	1	1	0	0	0	0	1	1	1	1	1	0	0	1	0	0	0	0	1	1
Guéasso centre	Urban	HU	168	54	1	1	M	Manon	0	0	1	1	1	0	1	1	1	1	1	1	0	1	1	1	0	0	0	0	1	2	1	0	1	0	0	1	0	0	0	1	1	1
Guéasso centre	Urban	HU	169	39	1	3	M	Malinké	0	0	1	1	1	0	0	1	0	1	1	1	0	0	1	1	0	0	0	0	1	2	1	1	0	0	0	1	1	0	0	1	0	1
Guéasso centre	Urban	HU	170	45	1	2	M	Kônon	0	1	1	1	1	1	1	1	1	1	1	1	1	1	1	1	0	0	0	0	1	1	0	0	0	0	0	0	0	1	0	1	0	1
Guéasso centre	Urban	HU	171	48	1	1	M	Manon	1	1	1	1	1	1	1	1	1	1	1	1	0	1	1	1	0	0	0	0	1	2	1	0	0	0	0	0	0	0	0	1	1	0
Guéasso centre	Urban	HU	172	40	1	1	M	Kônon	1	1	1	1	1	1	1	1	1	1	1	1	1	1	1	1	0	0	0	0	1	1	0	0	0	0	0	0	0	1	0	0	1	1
Guéasso centre	Urban	HU	173	50	1	2	M	Guerzé	0	0	1	1	1	0	1	1	1	1	1	1	0	1	1	1	0	0	0	0	1	2	1	1	0	0	0	1	0	0	0	1	1	1
Guéasso centre	Urban	HU	174	60	1	1	M	Guerzé	0	0	0	0	0	0	0	1	1	1	1	1	0	1	1	1	0	0	0	0	1	2	1	1	1	0	0	0	0	0	0	1	0	1
Guéasso centre	Urban	HU	175	58	1	1	M	Kônon	0	0	0	0	0	0	0	0	1	1	1	1	0	1	1	1	0	0	1	2	0	0	1	1	1	1	1	1	0	0	0	1	0	1
Guéasso centre	Urban	LR	176	40	2	1	M	Kônon	0	1	1	1	1	0	1	1	1	1	1	1	1	1	1	3	0	0	0	0	1	1	0	0	0	0	0	0	0	1	0	1	0	1
Guéasso centre	Urban	LR	177	35	2	1	M	Guerzé	0	0	1	1	1	0	1	1	1	1	1	1	0	1	1	1	0	0	0	0	1	1	1	1	0	0	0	0	0	0	0	1	0	1
Guéasso centre	Urban	LR	178	37	2	2	M	Kônon	0	0	1	1	1	0	0	0	0	1	1	1	0	0	1	1	0	0	1	4	0	0	0	1	0	0	0	0	1	0	0	1	1	1
Guéasso centre	Urban	LR	179	32	2	3	M	Malinké	0	0	1	1	1	0	0	0	0	1	1	1	0	0	1	1	0	0	1	4	0	0	1	1	0	0	0	0	0	0	0	1	1	1
Guéasso centre	Urban	LR	180	30	2	3	M	koniaké	0	0	1	1	1	0	0	0	0	1	1	1	0	0	1	1	0	0	1	4	0	0	1	1	0	0	0	0	1	0	0	0	1	1
Guéasso centre	Urban	BS	181	38	2	1	M	Kônon	0	1	1	1	1	0	1	1	1	1	1	1	0	1	1	1	0	0	0	0	1	2	0	0	0	0	0	0	0	1	0	1	0	1
Guéasso centre	Urban	BS	182	40	2	2	M	Zogwota	0	1	1	1	1	0	1	1	1	1	1	1	0	1	1	5	0	0	0	0	1	1	0	0	0	0	0	0	0	1	0	1	0	1
Guéasso centre	Urban	BS	183	35	2	1	C	Guerzé	0	1	1	1	1	0	1	1	1	1	1	1	0	1	1	1	0	0	0	0	1	1	0	0	0	0	0	0	0	1	0	1	0	1
Guéasso centre	Urban	EM	184	80	1	1	M	Zogwota	0	0	0	0	0	0	0	1	1	1	1	1	1	1	1	1	0	0	0	0	1	1	1	1	1	0	0	0	0	0	0	1	1	1
Guéasso centre	Urban	EM	185	69	1	1	M	Kônon	0	0	0	0	0	0	0	1	1	1	1	1	1	1	1	1	0	0	0	0	1	1	1	0	0	0	0	1	0	0	0	1	0	1
Guéasso centre	Urban	EM	186	77	1	1	M	Zogwota	0	0	0	0	0	0	0	1	1	1	1	1	1	1	1	1	0	0	0	0	1	1	1	1	1	0	0	0	1	0	0	1	0	1
Guéasso centre	Urban	HO	187	23	2	1		Kônon	0	1	1	1	1	0	1	1	1	1	1	1	0	1	1	1	0	0	0	0	1	1	0	0	0	0	0	0	0	1	0	1	0	1
Guéasso centre	Urban	HO	188	30	2	1	M	Manon	0	0	1	1	1	0	1	1	1	1	1	1	0	1	1	1	0	0	0	0	1	2	1	1	0	0	0	0	0	0	0	1	1	1
Guéasso centre	Urban	HO	189	25	2	2	C	Zogwota	1	1	1	1	1	1	1	1	1	1	1	1	0	1	1	1	0	0	0	0	1	1	0	0	0	0	0	0	0	0	1	1	1	1
Guéasso centre	Urban	HO	190	27	2	1	M	Kônon	1	1	1	1	1	1	1	1	1	1	1	1	0	1	1	1	0	0	0	0	1	2	0	0	0	0	0	0	0	0	1	1	1	1
Guéasso centre	Urban	HO	191	34	2	1	M	Maouka	1	1	1	1	1	1	1	1	1	1	1	1	0	1	1	1	0	0	0	0	1	1	0	0	0	0	0	0	0	0	1	1	0	1
Guéasso centre	Urban	HO	192	46	2	1	M	Zogwota	0	0	1	1	1	0	1	1	1	1	1	1	0	1	1	1	0	0	0	0	1	2	1	1	0	0	0	1	0	0	0	1	0	1
Guéasso centre	Urban	HO	193	52	2	2	M	Guerzé	0	0	1	1	1	0	1	1	1	1	1	1	0	1	1	1	0	0	0	0	1	1	1	1	0	0	0	1	0	0	0	0	0	1
Guéasso centre	Urban	HO	194	50	2	1	M	koniaké	0	0	0	0	0	0	0	1	1	1	1	1	0	1	1	1	0	0	0	0	1	2	1	1	1	0	0	0	1	0	0	1	1	1
Guéasso centre	Urban	HO	195	32	2	3	M	Kônon	0	0	1	1	1	0	1	1	1	1	1	1	0	1	1	1	0	0	0	0	1	1	1	1	0	0	0	0	0	0	0	1	0	1
Guéasso centre	Urban	HO	196	45	2	1	M	Manon	0	1	1	1	1	0	1	1	1	1	1	1	0	1	1	1	0	0	0	0	1	2	0	0	0	0	0	0	0	1	0	1	0	1
Guéasso centre	Urban	HO	197	40	2	2	M	koniaké	1	1	1	1	1	0	1	1	1	1	1	1	0	1	1	1	0	0	0	0	1	1	0	0	0	0	0	0	0	0	1	1	0	1
Guéasso centre	Urban	HO	198	22	2	2	M	Kônon	1	1	1	1	1	1	1	1	1	1	1	1	0	1	1	1	0	0	0	0	1	2	0	0	0	0	0	0	0	0	1	1	1	1
Guéasso centre	Urban	HO	199	25	2	1	divoCé	Guerzé	1	1	1	1	1	1	1	1	1	1	1	1	0	1	1	1	0	0	0	0	1	1	0	0	0	0	0	0	0	0	1	1	0	1
Guéasso centre	Urban	HO	200	32	2	2	M	Zogwota	0	0	0	0	0	0	0	1	1	1	1	1	0	1	1	1	0	0	0	0	1	1	1	0	1	1	0	0	1	0	0	1	1	1
Guéasso centre	Urban	HO	201	35	2	1	M	Kônon	0	0	0	0	1	0	0	1	1	1	1	1	0	1	1	1	0	0	0	0	1	1	1	1	1	0	1	0	0	0	0	1	0	1
Guéasso centre	Urban	HO	202	26	2	3	M	koniaké	0	0	0	0	0	0	0	1	1	1	1	1	0	1	1	1	0	0	0	0	1	1	1	1	1	0	0	1	1	0	0	1	0	1
Guéasso centre	Urban	HO	203	28	2	1	M	Kônon	0	1	1	1	1	1	1	1	1	1	1	1	0	1	1	1	0	0	0	0	1	1	0	0	0	0	0	0	0	1	0	1	0	1
Guéasso centre	Urban	HO	204	36	2	1	divoCé	Kônon	0	0	1	1	1	1	1	1	1	1	1	1	0	1	1	1	0	0	0	0	1	2	0	0	1	0	0	0	0	0	0	1	1	1
Guéasso centre	Urban	HO	205	42	2	2	M	Zogwota	0	0	0	0	0	0	0	1	1	1	1	1	0	1	1	1	0	0	0	0	1	1	0	0	0	0	0	0	0	1	0	1	1	1
Guéasso centre	Urban	HO	206	41	2	1	M	Kônon	0	0	1	1	1	0	1	1	1	1	1	1	0	1	1	1	0	0	0	0	1	2	1	1	1	0	0	0	0	0	0	1	1	1
Guéasso centre	Urban	HO	207	39	2	1	M	Guerzé	1	1	1	1	1	0	1	1	1	1	1	1	0	1	1	1	0	0	0	0	1	1	0	0	0	0	0	0	0	0	1	1	0	1
Guéasso centre	Urban	HO	208	25	2	2	M	Maouka	0	1	1	1	1	0	1	1	1	1	1	1	0	1	1	1	0	0	0	0	1	2	0	0	0	0	0	0	0	1	0	1	0	1
Guéasso centre	Urban	HO	209	28	2	2	C	Manon	1	1	1	1	1	0	1	1	1	1	1	1	0	1	1	1	0	0	0	0	1	2	0	0	0	0	0	0	0	0	1	1	0	1
GONOTA GBOZOU	Rural	FA	210	43	1	1	M	Zogwota	1	1	1	1	1	0	1	1	1	1	1	1	0	1	0	0	1	1	0	0	1	2	0	0	0	0	0	0	0	0	1	0	1	1
GONOTA GBOZOU	Rural	FA	211	42	1	1	M	Zogwota	1	1	1	1	1	0	1	1	1	1	1	1	0	1	1	1	0	0	0	0	1	2	0	0	0	0	0	0	0	0	1	0	0	1
GONOTA GBOZOU	Rural	FA	212	48	1	1	M	Zogwota	1	1	1	1	1	0	1	1	1	1	1	1	0	1	0	0	1	1	0	0	1	1	0	0	0	0	0	0	0	0	1	1	0	1
GONOTA GBOZOU	Rural	FA	213	43	1	1	M	Guerzé	1	1	1	1	1	0	1	1	1	1	1	1	0	1	0	0	1	1	0	0	1	2	0	0	0	0	0	0	0	0	1	1	1	1
GONOTA GBOZOU	Rural	FA	214	56	1	1	M	Maouka	1	1	1	1	1	0	1	1	1	1	1	1	0	1	1	1	0	0	0	0	1	2	0	0	0	0	0	0	0	0	1	0	0	1
GONOTA GBOZOU	Rural	FA	215	48	1	1	M	Zogwota	1	1	1	1	1	0	1	1	1	1	1	1	0	1	0	0	1	1	0	0	1	1	0	0	0	0	0	0	0	0	1	1	1	0
GONOTA GBOZOU	Rural	FA	216	58	1	1	M	Zogwota	1	1	1	1	1	0	1	1	1	1	1	1	0	1	0	0	1	1	0	0	1	2	0	0	0	0	0	0	0	0	1	0	0	1
GONOTA GBOZOU	Rural	FA	217	65	1	2	M	Kônon	1	1	1	1	1	0	1	1	1	1	1	1	0	1	1	1	0	0	0	0	1	2	0	0	0	0	0	0	0	0	1	0	1	1
GONOTA GBOZOU	Rural	FA	218	51	1	1	M	Zogwota	1	1	1	1	1	0	1	1	1	1	1	1	0	1	0	0	1	1	0	0	1	1	0	0	0	0	0	0	0	0	1	0	0	1
GONOTA GBOZOU	Rural	FA	219	32	1	1	M	Zogwota	1	1	1	1	1	0	1	1	1	1	1	1	0	1	0	0	1	1	0	0	1	2	0	0	0	0	0	0	0	0	1	1	1	1
GONOTA GBOZOU	Rural	FA	220	30	1	1	M	Zogwota	1	1	1	1	1	0	1	1	1	1	1	1	0	1	1	1	0	0	0	0	1	2	0	0	0	0	0	0	0	0	1	0	1	1
GONOTA GBOZOU	Rural	FA	221	39	1	1	M	Manon	1	1	1	1	1	0	1	1	1	1	1	1	0	1	0	0	1	1	0	0	1	1	0	0	0	0	0	0	0	0	1	0	0	1
GONOTA GBOZOU	Rural	FA	222	53	1	1	M	Zogwota	1	1	1	1	1	0	1	1	1	1	1	1	0	1	0	0	1	1	0	0	1	2	0	0	0	0	0	0	0	0	1	0	0	1
GONOTA GBOZOU	Rural	FA	223	54	1	3	M	Kônon	1	1	1	1	1	0	1	1	1	1	1	1	0	1	1	1	0	0	0	0	1	2	0	0	0	0	0	0	0	0	1	0	0	1
GONOTA GBOZOU	Rural	FA	224	55	1	3	M	Maouka	1	1	1	1	1	0	1	1	1	1	1	1	0	1	0	0	1	1	0	0	1	1	0	0	0	0	0	0	0	0	1	1	1	1
GONOTA GBOZOU	Rural	FA	225	30	1	1	M	Kônon	1	1	1	1	1	0	1	1	1	1	1	1	0	1	1	1	0	0	0	0	1	1	0	0	0	0	0	0	0	0	1	0	0	1
GONOTA GBOZOU	Rural	FA	226	25	1	1	M	Maouka	1	1	1	1	1	0	1	1	1	1	1	1	0	1	0	0	1	1	0	0	1	1	0	0	0	0	0	0	0	0	1	0	0	1
GONOTA GBOZOU	Rural	FA	227	27	1	1	M	Zogwota	1	1	1	1	1	0	1	1	1	1	1	1	0	1	1	1	0	0	0	0	1	1	0	0	0	0	0	0	0	0	1	1	0	1
GONOTA GBOZOU	Rural	FA	228	32	1	1	M	Maouka	1	1	1	1	1	0	1	1	1	1	1	1	0	1	1	1	0	0	0	0	1	1	0	0	0	0	0	0	0	0	1	1	1	1
GONOTA GBOZOU	Rural	FA	229	35	1	1	M	Kônon	1	1	1	1	1	0	1	1	1	1	1	1	0	1	1	1	0	0	0	0	1	1	0	0	0	0	0	0	0	0	1	0	0	1
GONOTA GBOZOU	Rural	HU	230	41	1	1	M	Zogwota	1	1	1	1	1	0	1	1	1	1	1	1	0	1	0	0	1	1	0	0	1	1	0	0	0	0	0	0	0	0	1	0	1	1
GONOTA GBOZOU	Rural	HU	231	37	1	1	M	Zogwota	1	1	1	1	1	0	1	1	1	1	1	1	0	1	0	0	1	2	0	0	1	1	0	0	0	0	0	0	0	0	1	0	0	1
GONOTA GBOZOU	Rural	HU	232	52	1	1	M	Zogwota	0	0	0	0	0	0	0	1	1	1	1	1	0	1	0	0	1	1	0	0	1	2	1	0	0	1	0	1	1	0	0	0	0	1
GONOTA GBOZOU	Rural	HU	233	48	1	1	M	Zogwota	0	0	1	1	1	0	1	1	1	1	1	1	0	1	1	1	0	0	0	0	1	1	1	1	0	0	0	0	0	0	0	0	0	1
GONOTA GBOZOU	Rural	HU	234	54	1	1	M	Zogwota	0	1	1	1	1	0	1	1	1	1	1	1	0	1	1	1	0	0	0	0	1	2	1	0	0	0	0	0	0	0	0	1	0	1
GONOTA GBOZOU	Rural	HU	235	51	1	1	M	Kônon	1	1	1	1	1	0	1	1	1	1	1	1	0	1	1	1	0	0	0	0	1	2	0	0	0	0	0	0	0	0	1	1	1	1
GONOTA GBOZOU	Rural	HU	236	32	1	1	M	Zogwota	1	1	1	1	1	0	1	1	1	1	1	1	0	1	0	0	1	1	0	0	1	1	0	0	0	0	0	0	0	0	1	1	0	1
GONOTA GBOZOU	Rural	HU	237	29	1	1	M	Kônon	0	1	1	1	1	0	1	1	1	1	1	1	0	1	0	0	1	1	0	0	1	2	1	0	0	0	0	0	0	0	0	0	1	1
GONOTA GBOZOU	Rural	HU	238	30	1	3	M	Zogwota	1	1	1	1	1	0	0	1	1	1	1	1	0	1	0	0	1	1	0	0	1	2	1	0	0	0	0	0	1	0	0	1	0	1
GONOTA GBOZOU	Rural	HU	239	43	1	3	M	Manon	1	1	1	1	1	0	0	1	1	1	1	1	0	0	1	1	0	0	0	0	1	1	1	0	0	0	0	0	1	0	0	0	0	1
GONOTA GBOZOU	Rural	HO	240	42	2	1	M	Zogwota	1	1	1	1	1	0	1	1	1	1	1	1	0	1	1	1	0	0	0	0	1	2	0	0	0	0	0	0	0	0	1	0	0	1
GONOTA GBOZOU	Rural	HO	241	23	2	1	M	Kônon	1	1	1	1	1	0	1	1	1	1	1	1	0	1	0	0	1	1	0	0	1	1	0	0	0	0	0	0	0	0	1	0	1	1
GONOTA GBOZOU	Rural	HO	242	30	2	1	M	Zogwota	1	1	1	1	1	0	1	1	1	1	1	1	0	1	1	1	0	0	0	0	1	2	0	0	0	0	0	0	0	0	1	1	0	0
GONOTA GBOZOU	Rural	HO	243	25	2	1	M	Kônon	1	1	1	1	1	0	1	1	1	1	1	1	0	1	0	0	1	1	0	0	1	1	0	0	0	0	0	0	0	0	1	1	0	1
GONOTA GBOZOU	Rural	HO	244	34	2	2	M	Zogwota	1	1	1	1	1	0	1	1	1	1	1	1	0	1	0	0	1	1	0	0	1	2	0	0	0	0	0	0	0	0	1	0	0	1
GONOTA GBOZOU	Rural	HO	245	56	2	1	M	Maouka	1	1	1	1	1	0	1	1	1	1	1	1	0	1	0	0	1	1	0	0	1	2	0	0	0	0	0	0	0	1	0	0	0	1
GONOTA GBOZOU	Rural	HO	246	45	2	1	M	Maouka	1	1	1	1	1	0	1	1	1	1	1	1	0	1	1	1	0	0	0	0	1	2	0	0	0	0	0	0	0	0	1	0	1	1
GONOTA GBOZOU	Rural	HO	247	60	2	1	M	Zogwota	1	1	1	1	1	0	1	1	1	1	1	1	0	1	0	0	1	1	0	0	1	1	0	0	0	0	0	0	0	0	1	1	1	1
GONOTA GBOZOU	Rural	HO	248	55	2	2	M	Zogwota	1	1	1	1	1	0	1	1	1	1	1	1	0	1	0	0	1	1	0	0	1	2	0	0	0	0	0	0	0	0	1	0	1	1
GONOTA GBOZOU	Rural	HO	249	32	2	1	M	Zogwota	1	1	1	1	1	0	1	1	1	1	1	1	0	1	1	1	0	0	0	0	1	2	0	0	0	0	0	0	0	0	1	0	0	1
GONOTA GBOZOU	Rural	EM	250	69	1	1	M	Zogwota	0	0	0	0	0	0	0	1	1	1	1	1	1	1	0	0	1	1	0	0	1	1	1	0	1	1	1	1	0	0	0	1	1	1
GONOTA GBOZOU	Rural	EM	251	70	1	1	C	Kônon	1	1	1	1	1	0	1	1	1	1	1	1	0	1	1	1	0	0	0	0	1	1	0	0	0	0	0	0	0	0	1	0	0	1
SOUMOUTA	Rural	FA	252	42	1	1	M	Kônon	0	0	1	1	1	0	1	1	1	1	1	1	0	1	0	0	1	1	0	0	1	1	1	1	0	0	0	0	0	0	0	0	1	1
SOUMOUTA	Rural	FA	253	40	1	2	M	Guerzé	1	1	1	1	1	0	1	1	1	1	1	1	0	1	0	0	1	1	0	0	1	2	0	0	0	0	0	0	0	0	1	0	0	1
SOUMOUTA	Rural	FA	254	30	1	1	M	Zogwota	1	1	1	1	1	0	1	1	1	1	1	1	0	1	1	1	0	0	0	0	1	1	0	0	0	0	0	0	0	0	1	0	0	1
SOUMOUTA	Rural	FA	255	33	1	1	M	Zogwota	1	1	1	1	1	0	1	1	1	1	1	1	0	1	1	1	0	0	0	0	1	1	0	0	0	0	0	0	0	0	1	1	0	1
SOUMOUTA	Rural	FA	256	41	1	1	M	Zogwota	1	1	1	1	1	0	1	1	1	1	1	1	0	1	0	0	1	1	0	0	1	1	0	0	0	0	0	0	0	1	0	0	1	1
SOUMOUTA	Rural	FA	257	52	1	2	M	Zogwota	1	1	1	1	1	0	1	1	1	1	1	1	0	1	1	1	0	0	0	0	1	2	0	0	0	0	0	0	0	0	1	1	0	1
SOUMOUTA	Rural	FA	258	51	1	1	M	Zogwota	1	1	1	1	1	0	1	1	1	1	1	1	0	1	0	0	1	1	0	0	1	1	0	0	0	0	0	0	0	0	1	1	1	1
SOUMOUTA	Rural	FA	259	56	1	1	M	Zogwota	1	1	1	1	1	0	1	1	1	1	1	1	0	1	0	0	1	1	0	0	1	2	0	0	0	0	0	0	0	0	1	0	0	1
SOUMOUTA	Rural	FA	260	27	1	1	M	Kônon	1	1	1	1	1	0	1	1	1	1	1	1	0	1	1	1	0	0	0	0	1	2	0	0	0	0	0	0	0	0	1	0	1	1
SOUMOUTA	Rural	FA	261	45	1	2	M	Zogwota	1	1	1	1	1	0	1	1	1	1	1	1	0	1	0	0	1	1	0	0	1	1	0	0	0	0	0	0	0	0	1	1	0	1
SOUMOUTA	Rural	FA	262	42	1	1	M	Kônon	1	1	1	1	1	0	1	1	1	1	1	1	0	1	0	0	1	1	0	0	1	2	0	0	0	0	0	0	0	0	1	1	1	1
SOUMOUTA	Rural	FA	263	46	1	1	M	Zogwota	1	1	1	1	1	0	1	1	1	1	1	1	0	1	1	1	0	0	0	0	1	2	0	0	0	0	0	0	0	1	0	0	1	1
SOUMOUTA	Rural	FA	264	50	1	1	M	Kônon	1	1	1	1	1	0	1	1	1	1	1	1	0	1	0	0	1	1	0	0	1	1	0	0	0	0	0	0	0	0	1	1	1	1
SOUMOUTA	Rural	FA	265	25	1	2	M	Zogwota	1	1	1	1	1	0	1	1	1	1	1	1	0	1	0	0	1	1	0	0	1	2	0	0	0	0	0	0	0	0	1	0	0	1
SOUMOUTA	Rural	FA	266	36	1	1	M	Kônon	1	1	1	1	1	0	1	1	1	1	1	1	0	1	1	1	0	0	0	0	1	1	0	0	0	0	0	0	0	0	1	0	1	1
SOUMOUTA	Rural	FA	267	52	1	1	M	Guerzé	1	1	1	1	1	0	1	1	1	1	1	1	0	1	1	1	0	0	0	0	1	1	0	0	0	0	0	0	0	0	1	0	0	1
SOUMOUTA	Rural	FA	268	43	1	1	M	Kônon	1	1	1	1	1	0	1	1	1	1	1	1	0	1	0	0	1	1	0	0	1	1	0	0	0	0	0	0	0	0	1	1	1	1
SOUMOUTA	Rural	FA	269	63	1	2	M	Guerzé	1	1	1	1	1	0	1	1	1	1	1	1	0	1	0	0	1	1	0	0	1	1	0	0	0	0	0	0	0	0	1	0	0	1
SOUMOUTA	Rural	FA	270	58	1	1	M	Maouka	1	1	1	1	1	0	1	1	1	1	1	1	0	1	1	1	0	0	0	0	1	1	0	0	0	0	0	0	0	0	1	1	0	1
SOUMOUTA	Rural	FA	271	30	1	1	M	Zogwota	1	1	1	1	1	0	1	1	1	1	1	1	0	1	0	0	1	1	0	0	1	1	0	0	0	0	0	0	0	0	1	0	0	1
SOUMOUTA	Rural	HU	272	39	1	2	M	Kônon	1	1	1	1	1	1	1	1	1	1	1	1	0	1	0	0	1	1	0	0	1	1	1	0	0	0	0	0	0	0	0	0	0	1
SOUMOUTA	Rural	HU	273	40	1	2	M	Kônon	1	1	1	1	1	0	1	1	1	1	1	1	0	1	0	0	1	1	0	0	1	1	0	0	0	0	0	0	0	0	1	1	1	1
SOUMOUTA	Rural	HU	274	35	1	1	M	Zogwota	1	1	1	1	1	0	1	1	1	1	1	1	0	1	1	1	0	0	0	0	1	1	0	0	0	0	0	0	0	0	1	0	0	1
SOUMOUTA	Rural	HU	275	30	1	1	M	Kônon	1	1	1	1	1	0	1	1	1	1	1	1	0	1	0	0	1	1	0	0	1	1	0	0	0	0	0	0	0	0	1	0	0	1
SOUMOUTA	Rural	HU	276	45	1	1	M	Zogwota	1	1	1	1	1	0	1	1	1	1	1	1	0	1	1	1	0	0	0	0	1	1	0	0	0	0	0	0	0	0	1	1	1	0
SOUMOUTA	Rural	HO	277	30	2	1	M	Kônon	0	1	1	1	1	0	1	1	1	1	1	1	0	1	0	0	1	1	0	0	1	1	0	0	0	0	0	0	0	1	0	0	1	1
SOUMOUTA	Rural	HO	278	28	2	1	M	Zogwota	1	1	1	1	1	0	1	1	1	1	1	1	0	1	0	0	1	1	0	0	1	1	0	0	0	0	0	0	0	0	1	1	0	1
SOUMOUTA	Rural	HO	279	35	2	1	M	Kônon	1	1	1	1	1	0	1	1	1	1	1	1	0	1	0	0	1	1	0	0	1	1	0	0	0	0	0	0	0	0	1	0	0	1
SOUMOUTA	Rural	HO	280	40	2	2	M	Zogwota	1	1	1	1	1	0	1	1	1	1	1	1	0	1	1	1	0	0	0	0	1	1	0	0	0	0	0	0	0	0	1	0	0	1
SOUMOUTA	Rural	HO	281	32	2	2	M	Zogwota	1	1	1	1	1	0	1	1	1	1	1	1	0	1	0	0	1	1	0	0	1	1	0	0	0	0	0	0	0	0	1	1	0	1
SOUMOUTA	Rural	HO	282	20	2	2	M	Kônon	1	1	1	1	1	0	1	1	1	1	1	1	0	1	0	0	1	1	0	0	1	1	0	0	0	0	0	0	0	0	1	1	1	0
SOUMOUTA	Rural	HO	283	33	2	2	M	Kônon	1	1	1	1	1	0	1	1	1	1	1	1	0	1	1	1	0	0	0	0	1	1	0	0	0	0	0	0	0	0	1	0	1	1
SOUMOUTA	Rural	HO	284	35	2	1	M	Guerzé	1	1	1	1	1	0	1	1	1	1	1	1	0	1	0	0	1	1	0	0	1	1	0	0	0	0	0	0	0	0	1	1	1	1
SOUMOUTA	Rural	HO	285	42	2	1	M	Zogwota	1	1	1	1	1	0	1	1	1	1	1	1	0	1	1	1	0	0	0	0	1	1	0	0	0	0	0	0	0	0	1	0	0	1
SOUMOUTA	Rural	HO	286	40	2	2	C	Kônon	1	1	1	1	1	0	1	1	1	1	1	1	0	1	1	1	0	0	0	0	1	1	0	0	0	0	0	0	0	0	1	1	1	1
SOUMOUTA	Rural	HO	287	52	2	1	M	Zogwota	1	1	1	1	1	0	1	1	1	1	1	1	0	1	0	0	1	1	0	0	1	1	1	1	0	0	0	1	0	0	0	1	0	1
SOUMOUTA	Rural	HO	288	56	2	1	C	Guerzé	1	1	1	1	1	0	1	1	1	1	1	1	0	1	0	0	1	1	0	0	1	2	0	0	0	0	0	0	0	0	1	1	0	1
SOUMOUTA	Rural	HO	289	35	2	1	M	Kônon	1	1	1	1	1	0	1	1	1	1	1	1	0	1	1	1	0	0	0	0	1	1	0	0	0	0	0	0	0	0	1	1	0	1
SOUMOUTA	Rural	HO	290	34	2	2	M	Kônon	0	1	1	1	1	0	1	1	1	1	1	1	0	1	1	1	0	0	0	0	1	1	1	0	0	0	0	0	0	0	0	1	0	1
SOUMOUTA	Rural	HO	291	26	2	1	M	Zogwota	1	1	1	1	1	0	1	1	1	1	1	1	0	1	0	0	1	1	0	0	1	1	0	0	0	0	0	0	0	0	1	0	0	1
SOUMOUTA	Rural	EM	292	72	1	1	M	Kônon	0	0	1	1	1	1	1	1	1	1	1	1	0	1	1	1	0	0	0	0	1	1	1	1	0	0	0	1	0	0	0	1	0	1
SAYOTA	Rural	FA	293	42	1	1	M	Guerzé	0	1	1	1	1	0	0	1	1	1	1	1	0	1	1	1	0	0	0	0	1	1	1	0	0	0	0	0	0	0	0	0	0	1
SAYOTA	Rural	FA	294	40	1	1	M	Zogwota	0	1	1	1	1	0	1	1	1	1	1	1	0	1	1	1	0	0	0	0	1	1	1	0	0	0	0	0	0	0	0	1	1	1
SAYOTA	Rural	FA	295	26	1	2	M	Zogwota	0	1	1	1	1	0	1	1	1	1	1	1	1	1	0	0	1	1	0	0	1	2	1	0	0	0	0	1	0	0	0	0	0	1
SAYOTA	Rural	FA	296	32	1	2	M	Zogwota	0	1	1	1	1	0	1	1	1	1	1	1	1	1	1	1	0	0	0	0	1	1	1	0	0	0	0	1	0	0	0	0	0	1
SAYOTA	Rural	FA	297	50	1	1	M	Guerzé	1	1	1	1	1	0	1	1	1	1	1	1	1	1	0	0	1	1	0	0	1	1	0	0	0	0	0	1	0	0	0	1	1	1
SAYOTA	Rural	FA	298	63	1	2	M	Kônon	0	0	1	1	1	0	1	1	1	1	1	1	1	1	1	1	0	0	0	0	1	1	1	1	0	0	0	1	0	0	0	1	0	1
SAYOTA	Rural	FA	299	28	1	2	M	Zogwota	1	1	1	1	1	1	1	1	1	1	1	1	1	1	1	1	0	0	0	0	1	1	0	0	0	0	0	0	0	0	1	0	0	1
SAYOTA	Rural	FA	300	30	1	2	M	Manon	0	0	0	0	0	0	1	1	1	1	1	1	1	1	0	0	1	1	0	0	1	1	0	1	0	0	1	1	0	0	0	1	1	0
SAYOTA	Rural	FA	301	29	1	1	M	Kônon	1	1	1	1	1	1	1	1	1	1	1	1	1	1	1	1	0	0	0	0	1	1	0	0	0	0	0	0	0	0	1	1	1	1
SAYOTA	Rural	FA	302	33	1	2	M	Guerzé	0	1	1	1	1	0	1	1	1	1	1	1	0	1	1	1	0	0	0	0	1	1	1	0	0	0	0	0	0	0	0	0	1	1
SAYOTA	Rural	FA	303	41	1	3	M	Maouka	0	0	1	1	1	0	1	1	1	1	1	1	1	1	0	0	1	1	0	0	1	1	1	1	0	0	0	1	0	0	0	1	1	1
SAYOTA	Rural	FA	304	26	1	1	M	Zogwota	0	1	1	1	1	0	1	1	1	1	1	1	1	1	0	0	1	1	0	0	1	2	0	0	0	0	0	1	0	0	0	0	0	1
SAYOTA	Rural	FA	305	62	1	1	M	Kônon	0	1	1	1	1	0	1	1	1	1	1	1	1	1	1	1	0	0	0	0	1	1	1	0	0	0	0	1	0	0	0	1	1	0
SAYOTA	Rural	FA	306	39	1	2	M	Zogwota	1	1	1	1	1	0	1	1	1	1	1	1	1	1	1	1	0	0	0	0	1	2	0	0	0	0	0	0	0	0	1	1	0	1
SAYOTA	Rural	FA	307	54	1	2	M	Maouka	0	1	1	1	1	0	1	1	1	1	1	1	1	1	1	1	0	0	0	0	1	1	1	0	0	0	0	0	0	0	0	0	1	1
SAYOTA	Rural	FA	308	56	1	1	M	Zogwota	0	1	1	1	1	0	1	1	1	1	1	1	1	1	1	1	0	0	0	0	1	1	1	0	0	0	0	1	0	0	0	1	1	1
SAYOTA	Rural	FA	309	51	1	2	M	Guerzé	0	1	1	1	1	0	1	1	1	1	1	1	0	1	0	0	1	1	0	0	1	1	1	0	0	0	0	0	0	0	0	0	0	1
SAYOTA	Rural	FA	310	39	1	3	M	Maouka	1	1	1	1	1	0	1	1	1	1	1	1	0	1	1	1	0	0	0	0	1	1	0	0	0	0	0	0	0	0	1	0	1	1
SAYOTA	Rural	FA	311	40	1	2	M	Manon	1	1	1	1	1	0	1	1	1	1	1	1	0	1	1	5	0	0	0	0	1	2	0	0	0	0	0	0	0	0	1	0	0	1
SAYOTA	Rural	FA	312	35	1	1	M	Kônon	0	1	1	1	1	0	1	1	1	1	1	1	1	1	1	1	0	0	0	0	1	1	1	0	0	0	0	0	0	0	0	0	0	1
SAYOTA	Rural	HU	313	48	1	1	M	Zogwota	0	0	0	0	0	0	0	1	1	1	1	1	0	1	1	3	0	0	0	0	1	2	1	0	1	0	0	1	0	0	0	1	1	1
SAYOTA	Rural	HU	314	45	1	1	M	Zogwota	0	0	1	1	1	0	1	1	1	1	1	1	0	1	1	1	0	0	0	0	1	2	1	1	0	0	0	0	0	0	0	1	0	1
SAYOTA	Rural	HU	315	50	1	2	M	Zogwota	0	1	1	1	1	0	1	1	1	1	1	1	0	1	1	1	0	0	0	0	1	1	1	0	0	0	0	0	0	0	0	1	1	1
SAYOTA	Rural	HU	316	52	1	1	M	Zogwota	1	1	1	1	1	0	1	1	1	1	1	1	0	1	1	1	0	0	0	0	1	1	0	0	0	0	0	0	0	0	1	0	0	1
SAYOTA	Rural	HU	317	40	1	1	M	Maouka	1	1	1	1	1	0	1	1	1	1	1	1	0	1	1	1	0	0	0	0	1	1	0	0	0	0	0	0	0	0	1	1	0	1
SAYOTA	Rural	HO	318	26	2	2	M	Kônon	0	0	1	1	1	0	1	1	1	1	1	1	0	1	0	0	1	1	0	0	1	1	0	1	0	0	0	1	0	0	0	1	1	1
SAYOTA	Rural	HO	319	32	2	1	M	Manon	0	1	1	1	1	0	1	1	1	1	1	1	0	1	0	0	1	1	0	0	1	1	1	1	0	0	0	0	0	0	0	0	0	1
SAYOTA	Rural	HO	320	30	2	1	M	Zogwota	0	0	1	1	1	0	1	1	1	1	1	1	0	1	1	1	0	0	0	0	1	2	1	1	0	0	0	0	0	0	0	0	0	1
SAYOTA	Rural	HO	321	38	2	2	C	Guerzé	0	0	0	0	0	0	1	1	1	1	1	1	0	1	1	1	0	0	0	0	1	1	1	1	0	0	0	1	0	0	0	1	0	1
SAYOTA	Rural	HO	322	42	2	1	M	Maouka	0	1	1	1	1	0	1	1	1	1	1	1	0	1	1	1	0	0	0	0	1	1	1	0	0	0	0	0	0	0	0	0	0	1
SAYOTA	Rural	HO	323	45	2	1	divoCé	Zogwota	0	0	1	1	0	0	0	1	1	1	1	1	0	1	1	1	0	0	0	0	1	1	1	1	0	0	0	1	0	0	0	0	0	1
SAYOTA	Rural	HO	324	25	2	2	C	Maouka	0	1	1	1	1	0	1	1	1	1	1	1	1	1	1	1	0	0	0	0	1	1	1	0	0	0	0	1	0	0	0	0	0	1
SAYOTA	Rural	HO	325	29	2	1	M	Kônon	0	1	1	1	1	0	1	1	1	1	1	1	0	1	1	1	0	0	0	0	1	1	0	0	0	0	0	0	0	0	1	1	1	1
SAYOTA	Rural	HO	326	37	2	2	C	Maouka	1	1	1	1	1	0	1	1	1	1	1	1	0	1	0	0	1	1	0	0	1	1	0	0	0	0	0	0	0	0	1	1	0	1
SAYOTA	Rural	HO	327	46	2	1	M	Maouka	1	1	1	1	1	0	1	1	1	1	1	1	0	1	1	1	0	0	0	0	1	1	0	0	0	0	0	0	0	0	1	0	0	1
SAYOTA	Rural	HO	328	31	2	1	M	Maouka	0	1	1	1	1	0	1	1	1	1	1	1	1	1	1	1	0	0	0	0	1	2	1	0	0	0	0	0	0	0	0	0	0	1
SAYOTA	Rural	HO	329	54	2	2	M	Guerzé	0	0	0	0	0	0	0	1	1	1	1	1	0	1	1	1	0	0	0	0	1	1	1	1	1	0	0	1	1	0	0	1	1	0
SAYOTA	Rural	HO	330	23	2	1	C	Maouka	0	0	1	1	1	0	1	1	1	1	1	1	0	1	1	1	0	0	0	0	1	2		1	0	0	0	0	0	0	0	0	0	1
SAYOTA	Rural	HO	331	35	2	1	M	Zogwota	0	0	1	1	1	0	1	1	1	1	1	1	0	1	1	1	0	0	0	0	1	1	1	1	0	0	0	1	0	0	0	0	0	1
SAYOTA	Rural	EM	332	72	1	1	M	Zogwota	0	0	0	0	0	1	0	1	1	1	1	1	1	1	1	1	0	0	0	0	1	1	0	0	0	0	0	0	0	0	1	0	0	1
